# Supplementary material
Source: JCI journal article supplement (doi:10.1172/jci193495)
Supplement: sd1 [file 1]

# Supplemental Fig. 1 Prabhakar et al.

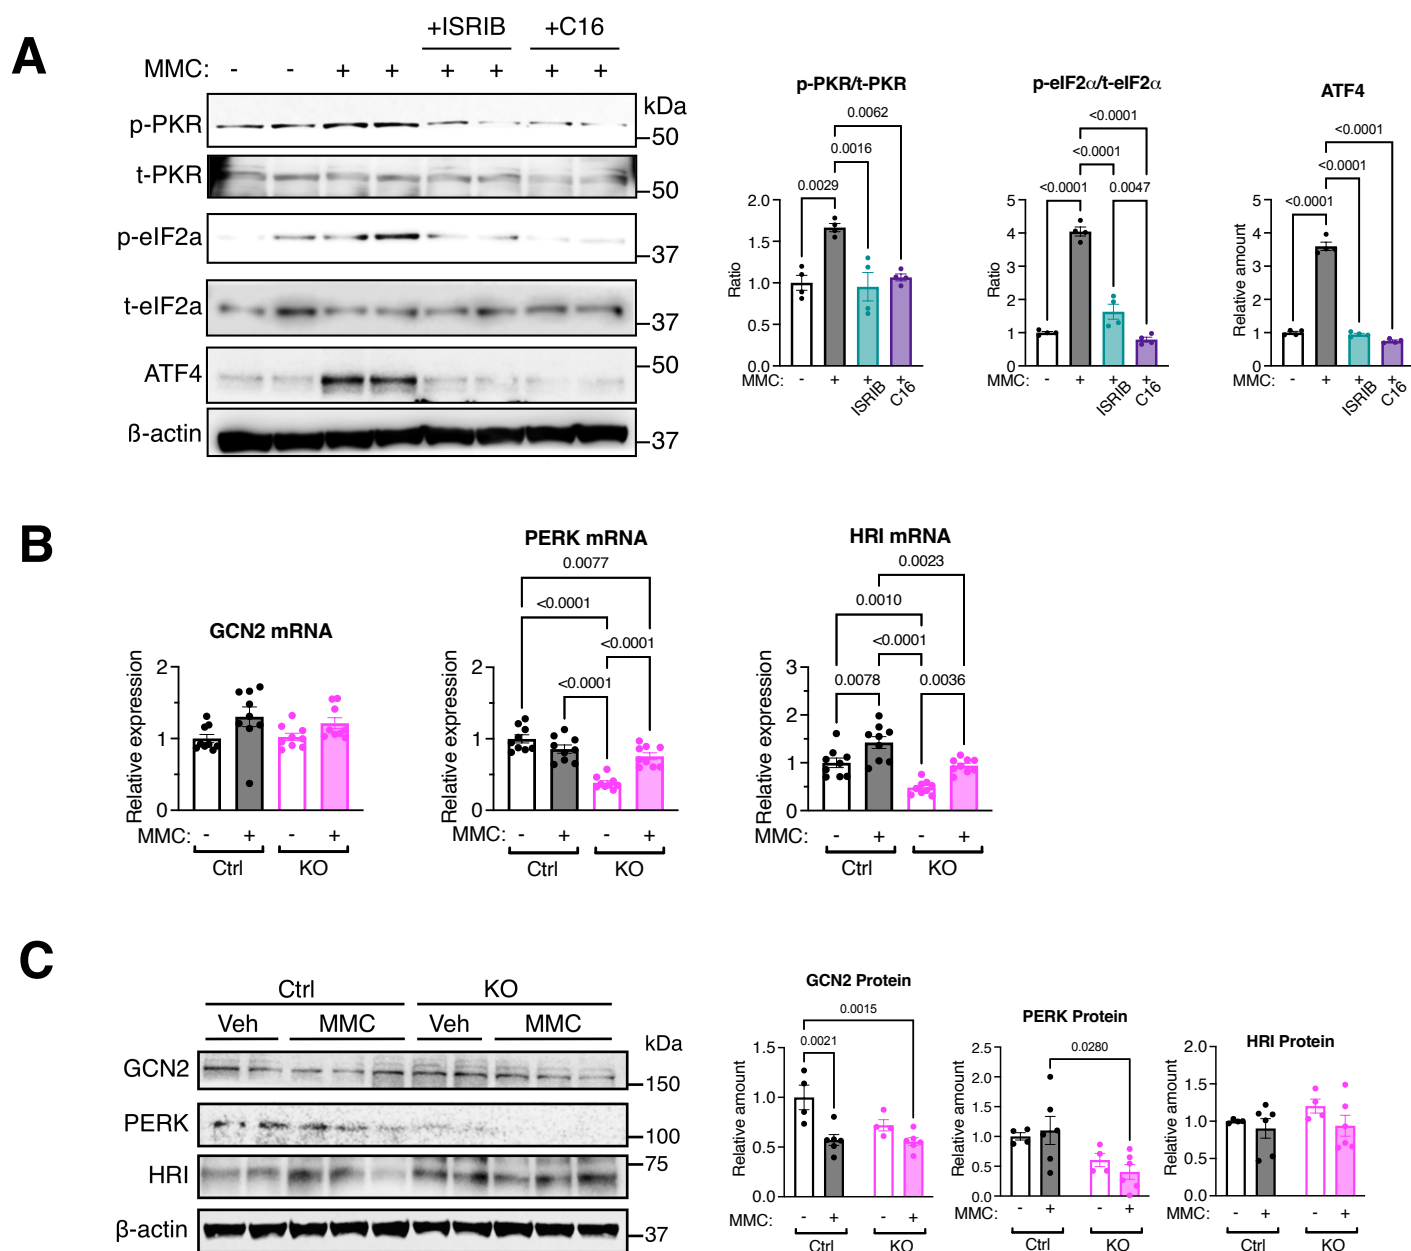

**Supple. Fig. 1 MMC activates PKR but not the other three eIF2 kinases. A.** Immunoblot analysis of the indicated proteins in total lung lysates from Control (Ctrl) mice co-treated with MMC and C16 (left). The relative amounts of the indicated proteins, normalized to  $\beta$ -actin, are shown as mean  $\pm$  SEM (right).  $n = 4$  samples per group. **B.** The level of mRNAs of GCN2, PERK, and HRI in the lung of Ctrl and KO mice administered with vehicle or MMC was analyzed by qRT-PCR on day 5 and shown as mean  $\pm$  SEM.  $n=6$  independent samples. **C.** The amount of GCN2, PERK, HRI, and  $\beta$ -actin is analyzed by immunoblots (left). The relative amounts of the indicated proteins, normalized to  $\beta$ -actin, are shown as mean  $\pm$  SEM (right).  $n = 4-6$  independent samples per group. Statistical analysis was performed using one-way ANOVA with Tukey's multiple comparisons test or two-way ANOVA with Tukey's multiple comparisons test with  $p < 0.05$ .

# Supplemental Fig. 2 Prabhakar et al.

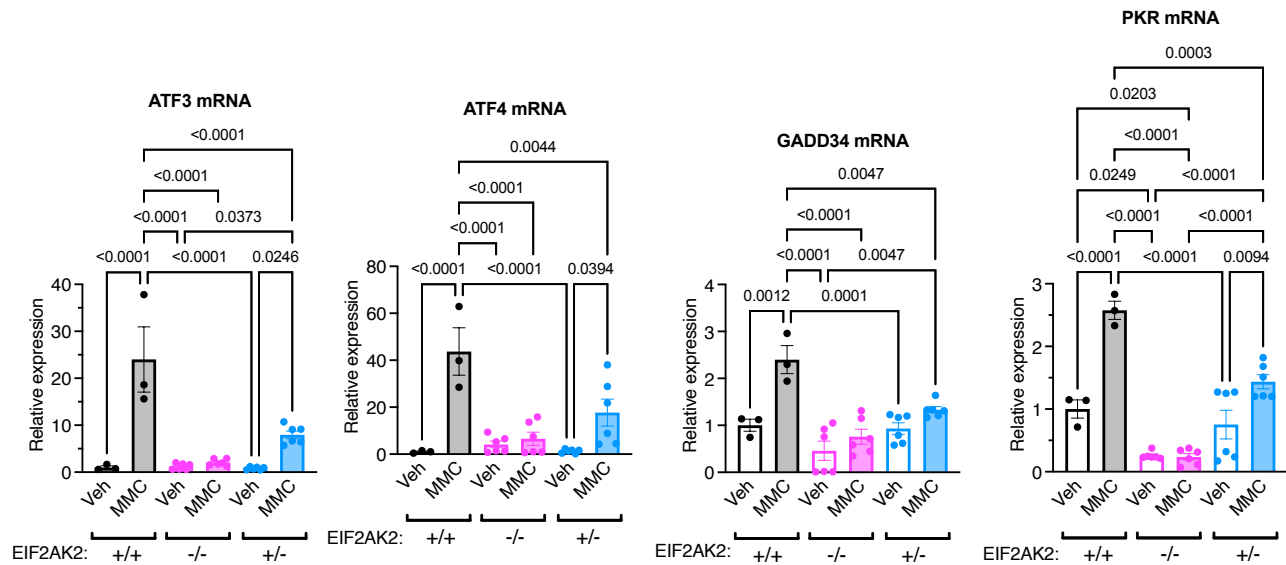

**Supple. Fig. 2** The levels of ATF4 target gene transcripts are modestly increased by MMC treatment in mice heterozygous for the PKR (*EIF2AK2*) gene. The level of mRNAs of ATF4 target genes, such as ATF3, ATF4, GADD34, and PKR in the lung of *EIF2AK2* wild type (+/+) mice (black), *EIF2AK2* homozygous-null (-/-) mice (red), and *EIF2AK2* heterozygous-null (+/-) mice (blue) administered with vehicle or MMC was analyzed by qRT-PCR on day 5 and shown as mean ± SEM. n = 3-6 independent samples. Statistical analysis was performed using one-way ANOVA with Tukey's multiple comparisons test with  $p < 0.05$ .

# Supplemental Fig. 3 Prabhakar et al.

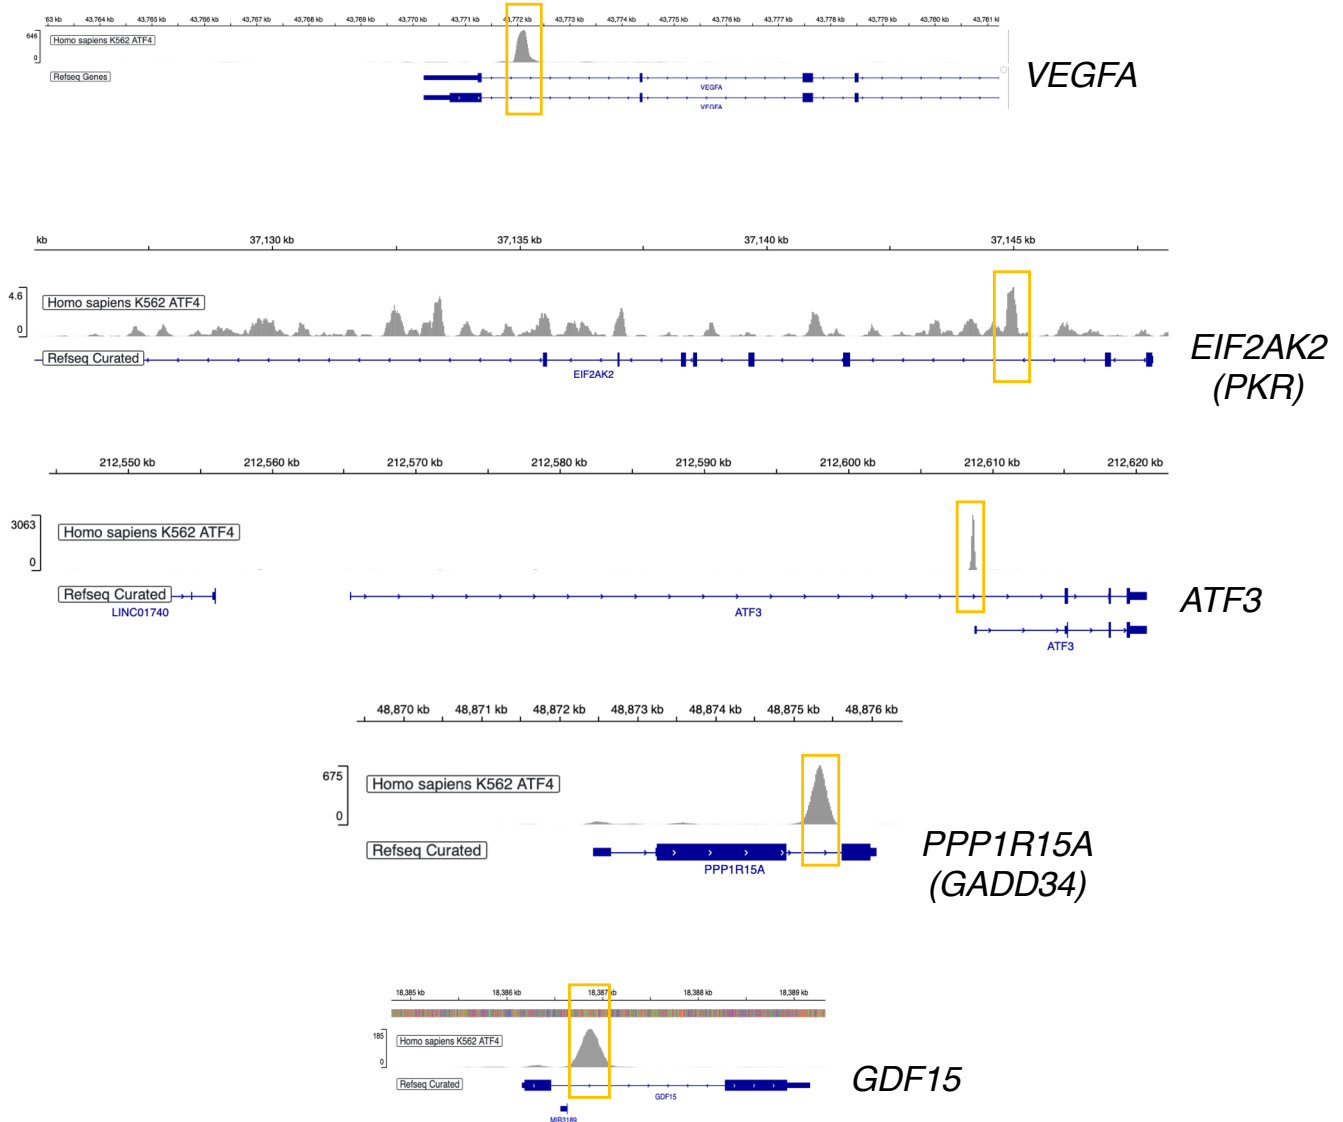

**Supple. Fig. 3 ChIP-seq maps the binding sites of ATF4 in the human genome** ChIP-seq data of the ENCODE database (Accession No. ENCFF484GNY and ENCFF742FPU) in human K562 cells identifies ATF4 binding sites in ATF4 target genes, such as *VEGFA*, *EIF2AK2*, *ATF3*, *PPP1R15A*, and *GDF15*. Orange rectangles indicate the genomic regions enriched by the ATF4 ChIP-seq.

## Supplemental Fig. 4 Prabhakar et al.

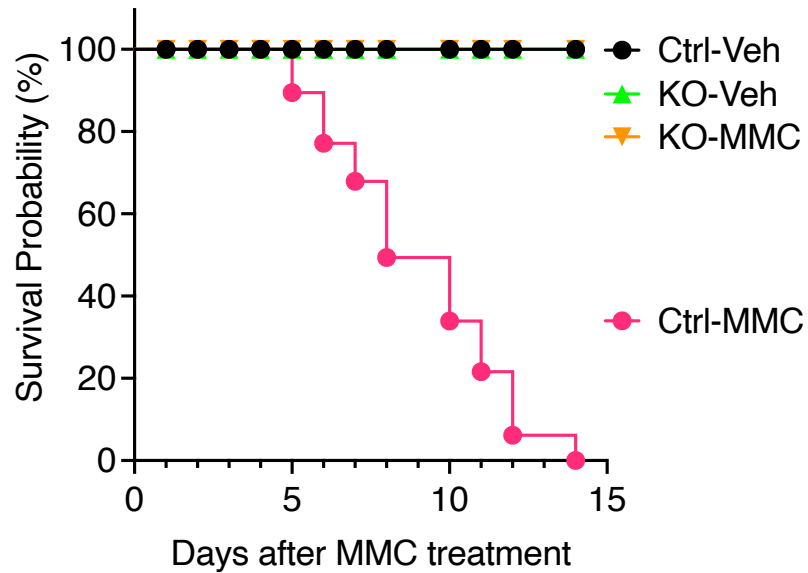

**Supple. Fig. 4 Kaplan Meier Survival curve of Ctrl and KO mice following MMC treatment** The survival curves of Veh-treated Ctrl (black circle), MMC-treated Ctrl (red circle), Veh-treated KO (green triangle), and MMC-treated KO mice (orange inverted triangle) are shown. These cohorts include male and female mice of 9-10 weeks old. No mortality was observed among Veh-treated Ctrl, Veh-treated KO, and MMC-treated KO mice. Statistical analysis was performed using Log-rank (Mantel-Cox) test with  $p < 0.05$ .

## Supplemental Fig. 5 Prabhakar et al.

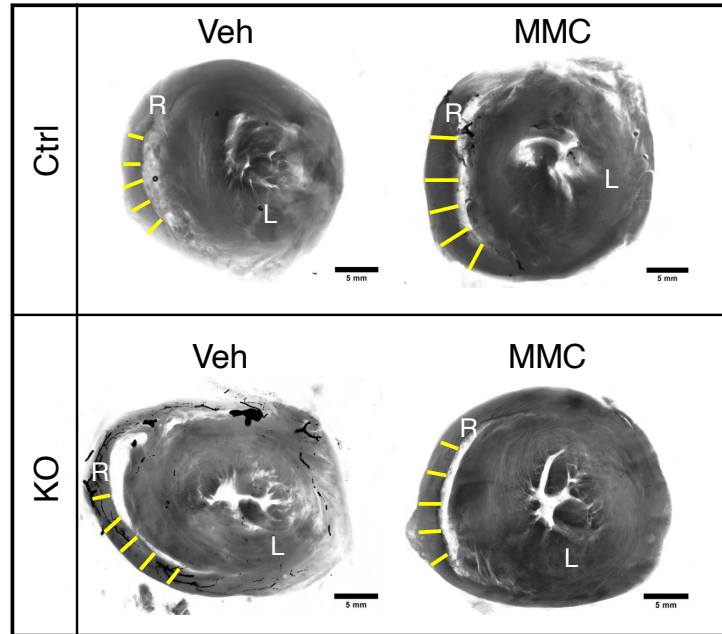

**Supple. Fig. 5 KO mice do not develop right ventricular hypertrophy following MMC treatment.** Representative transverse sections of hearts isolated from Veh- or MMC-treated Ctrl and KO mice are shown. The right ventricle (R) and left ventricle (V) are indicated. Wall thickness was measured as depicted by the yellow lines, and the mean values were calculated to determine the right ventricular (RV) wall thickness, as presented in Fig. 2B. Scale bar=5 mm.

# Supplemental Fig. 6 Prabhakar et al.

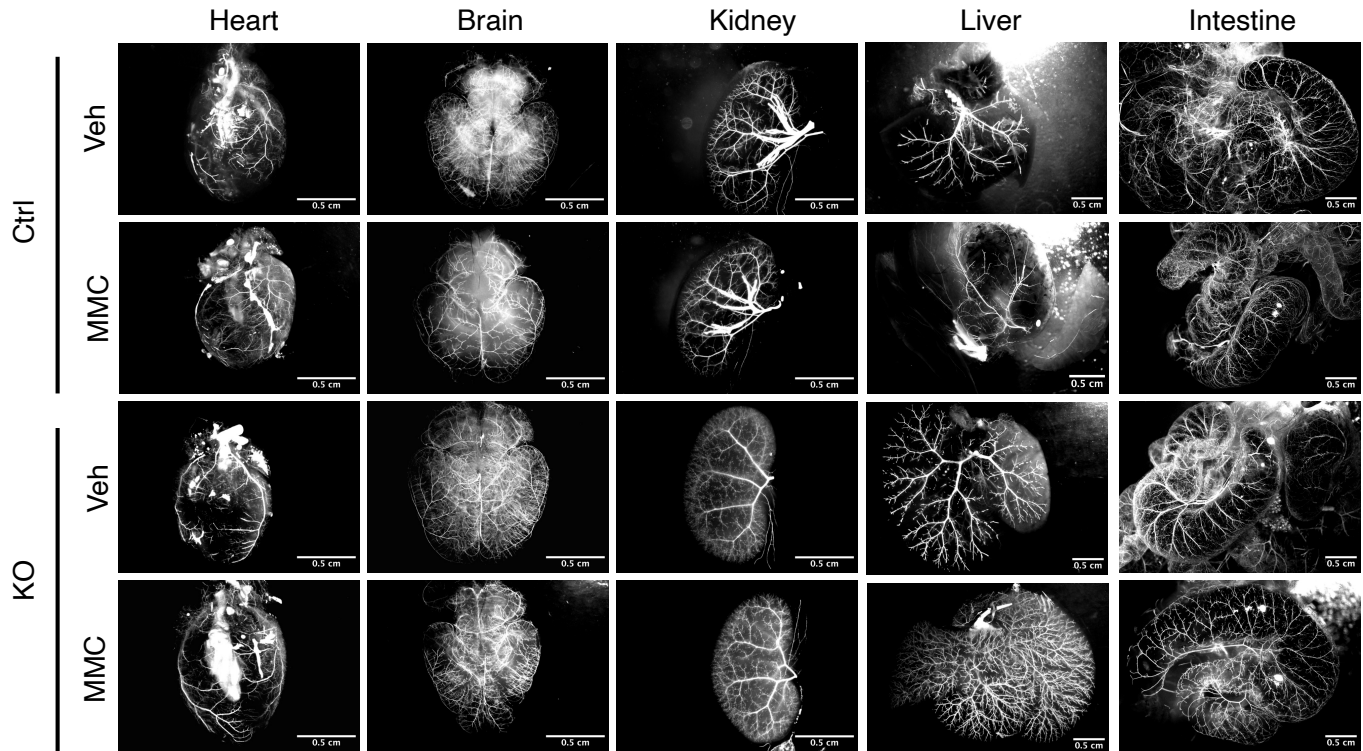

**Supple. Fig. 6 MMC-induced vascular remodeling is restricted within lung** Microfil casting of the vasculature in the heart, brain, kidney, liver, and intestine of Ctrl and KO mice treated with either Veh or MMC on day 5. Holistic images of the entire lung are displayed on the left, with a scale bar representing 0.5 cm. The number of branches and junctions per cm<sup>2</sup> of distal pulmonary vessels was quantified, with the data presented as mean  $\pm$  SEM (right). n = 3 independent samples per group.

# Supplemental Fig. 7 Prabhakar et al.

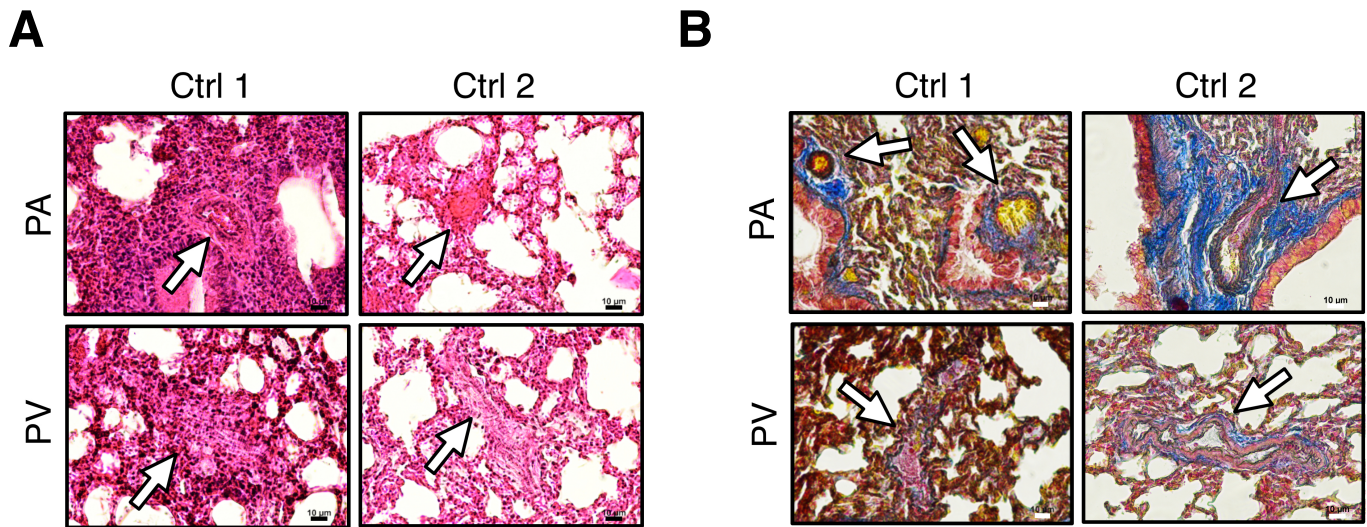

**Supple. Fig. 7 Fully occluded pulmonary vessels found in MMC-treated Ctrl mice that died after MMC administration** **A.** H&E staining images of PA and PV in two Ctrl mice (Ctrl 1 and 2) that died on day 5 following administration of MMC are shown. White arrows indicate vessels. Scale bar=10 μm. **B.** MSB staining images of PA and PV in Ctrl 1 and Ctrl 2 mice are shown. White arrows indicate vessels. White arrows indicate vessels. Collagen, smooth muscle, erythrocytes, fibrin, and platelets were visualized in blue, pink, yellow, red, and green, respectively. Scale bar=10 μm.

# Supplemental Fig. 8 Prabhakar et al.

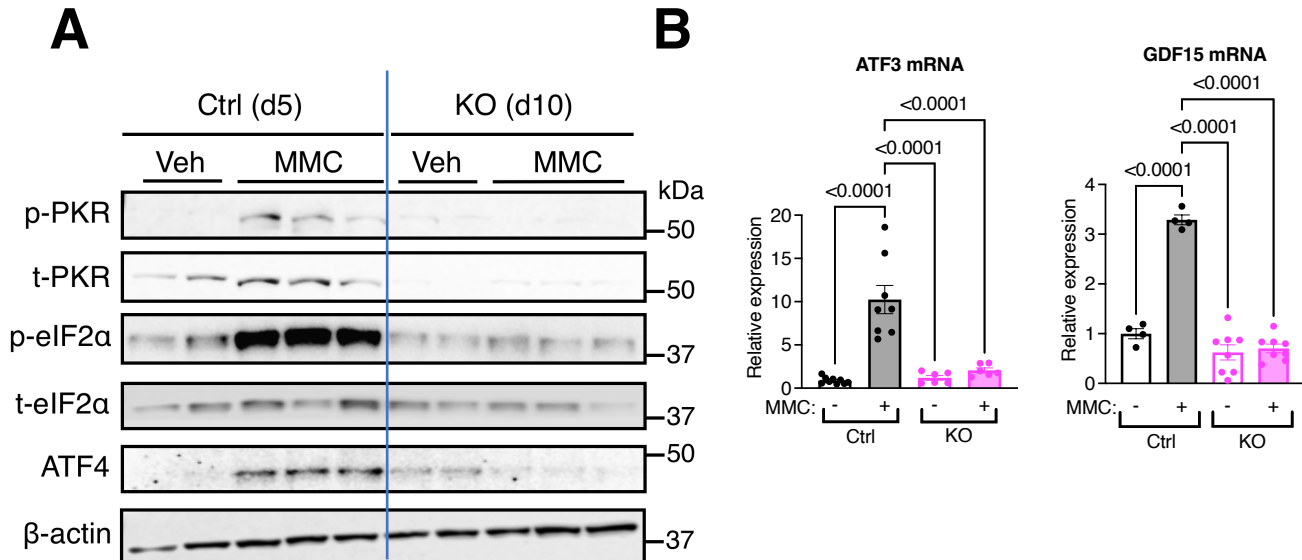

**Supple. Fig. 8 No ISR activation on day 10 after the MMC treatment in PKR-null mice** **A.** Immunoblot analysis of the indicated proteins in total lung lysates from vehicle (Veh)- or MMC-treated control (Ctrl) and PKR knockout (KO) mice. Lung tissues were collected on day 10 (d10) and representative images of the immunoblots are shown from Veh-treated Ctrl and KO mice ( $n = 2$ ) and MMC-treated Ctrl and KO mice ( $n = 3$ ). **B.** The levels of ATF3 and GDF15 mRNAs, target genes of ATF4, were analyzed by qRT-PCR in the lungs of Ctrl and KO mice treated with either vehicle or MMC. Samples were collected on day 5 for Ctrl mice and day 10 for KO mice and are presented as mean  $\pm$  SEM.  $n = 4-7$  independent samples per group. Statistical analysis was performed using one-way ANOVA with Tukey's multiple comparisons test with  $p < 0.05$ .

# Supplemental Fig. 9 Prabhakar et al.

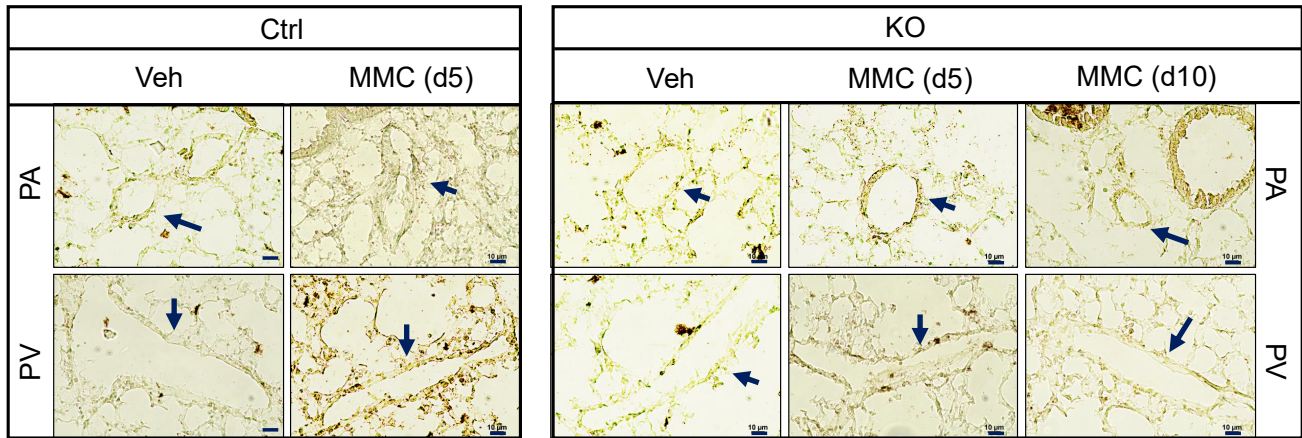

## Monocytes/Macrophages

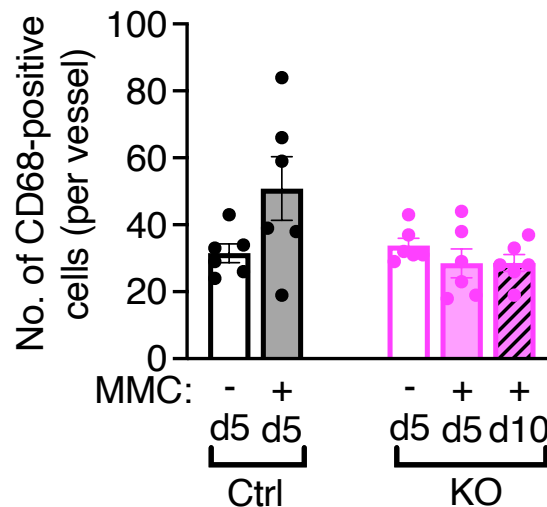

**Supple. Fig. 9 Infiltration of monocytes and macrophages is observed in MMC-treated Ctrl mouse lungs, but not in KO mouse lungs** CD68 immunostaining of the lungs from Ctrl on day 5 (d5) and KO mice on d5 and d10 after the administration of vehicle or MMC (top). An arrow indicates the location of the vessel (top). Scale bar=10 μm. The number of infiltrating monocytes/macrophages in the PA or PV is presented as the mean ± SEM (bottom). n=6 independent vessels. Statistical analysis was performed using two-way ANOVA with Tukey's multiple comparisons test with p<0.05.

**Supplemental Table 1. Reagents and kits**

| <b>Reagent</b>                                     | <b>Company</b>     | <b>Catalog no.</b> |
|----------------------------------------------------|--------------------|--------------------|
| DNase I                                            | Ambion             | AM2238             |
| Dynabeads protein A                                | Invitrogen         | 10002D             |
| Dynabeads protein G                                | Invitrogen         | 10004D             |
| Endothelial cell medium                            | ScienceCell        | 1001               |
| Evans blue                                         | Spectrum Chemicals | EV1005             |
| Fetal Bovine Serum (FBS)                           | Fisher scientific  | CC-4102B           |
| Mitomycin C                                        | Sigma-Aldrich      | M0503              |
| Mini-Protean TGX™ gels                             | Bio-Rad labs       | 4561021            |
| SurePAGE, Bis-Tris gels                            | GenScript          | M00665             |
| Nitrocellulose blotting membrane                   | Genesee Scientific | 84-875             |
| Protease Inhibitor                                 | Sigma              | P8340              |
| Phosphatase Inhibitor                              | Sigma              | P5726              |
| Preomics iST 96x                                   | Preomics           | P.O.00027          |
| RNase inhibitors                                   | Invitrogen         | AM2696             |
| SuperSignal™ West Dura extended duration substrate | ThermoFisher       | 34076              |
| SDS-PAGE sample buffer                             | Invitrogen         | NP0007             |
| SDS-PAGE reducing agent                            | Invitrogen         | NP0009             |
| Trypsin                                            | Life technologies  | 25200-072          |
| iScript cDNA synthesis kit                         | Bio-Rad labs       | 1708891            |
| iQ SYBR Green supermix                             | Bio-Rad labs       | 1708885            |

**Supplemental Table 2. Antibodies**

| <b>Antigen</b>                        | <b>Company</b>            | <b>Catalog no.</b> |
|---------------------------------------|---------------------------|--------------------|
| ATF4                                  | Cell signaling Technology | 11815              |
| ATF4                                  | Santa Cruz Biotechnology  | sc-390063          |
| Alexa Flour 488 anti-rabbit IgG (H+L) | Life technologies         | A21206             |
| Alexa Flour 488 anti-mouse IgG (H+L)  | Life technologies         | A21202             |
| Alexa Flour 555 anti-mouse IgG (H+L)  | Life technologies         | A32727             |
| Alexa Flour 555 anti-goat IgG (H+L)   | Life technologies         | A21432             |
| Alexa Flour 647 anti-mouse IgG (H+L)  | Life technologies         | A331571            |
| β-actin                               | Sigma-Aldrich             | A5441              |
| CD68                                  | Abcam                     | Ab125212           |
| eIF2α (total)                         | Cell signaling Technology | 9722               |
| eIF2α (total)                         | Santa Cruz Biotechnology  | sc-133132          |
| Phospho-Ser51-eIF2α                   | Cell signaling Technology | 3597               |
| GCN2                                  | Cell signaling Technology | 3302               |
| GADD34                                | Santa Cruz Biotechnology  | sc-373815          |
| HRI                                   | Santa Cruz Biotechnology  | sc-365239          |

|                                        |                           |            |
|----------------------------------------|---------------------------|------------|
| PERK                                   | Cell signaling Technology | 3192       |
| PKR (total)                            | Proteintech               | 18244-1-AP |
| PKR (total)                            | Santa Cruz Biotechnology  | sc-100378  |
| Phospho- PKR                           | Invitrogen                | 44-668G    |
| Rad51 (D4B10)                          | Cell signaling Technology | 8875       |
| Rad51                                  | Abcam                     | Ab133534   |
| VE-Cadherin                            | Cell signaling Technology | 2500       |
| VE-Cadherin                            | Santa Cruz Biotechnology  | sc-9989    |
| Transferrin                            | Proteintech               | 17435-1-AP |
| IRDye-680RD goat anti-rabbit IgG (H+L) | Li-Cor                    | 926-68071  |
| IRDye-800CW goat anti-rabbit IgG (H+L) | Li-Cor                    | 926-32211  |
| IRDye-680RD goat anti-mouse IgG (H+L)  | Li-Cor                    | 926-68070  |
| IRDye-800CW goat anti-mouse IgG (H+L)  | Li-Cor                    | 926-32210  |
| anti-Rabbit-IgG-HRP-conjugated         | Cell signaling Technology | 7074       |
| anti-Mouse-IgG-HRP- conjugated         | Cell signaling Technology | 7076       |

### Supplemental Table 3. PCR Primers for RT-qPCR and ChIP assay

| Primer Name            | Primer Sequence              | Annotation        |
|------------------------|------------------------------|-------------------|
| <i>mAtf3</i> -qPCR-F   | 5'-ATAAACACCTCTGCCATCGG-3'   | qRT-PCR for mouse |
| <i>mAtf3</i> -qPCR-R   | 5'-GCCTCCTTTTCTCTCATCTT-3'   | ATF3              |
| <i>mAtf4</i> -qPCR-F   | 5'-ATGGCGTATTAGAGGCAGC-3'    | qRT-PCR for mouse |
| <i>mAtf4</i> -qPCR-R   | 5'-CTTTGTCCGTTACAGCAACAC-3'  | ATF4              |
| <i>mPkr</i> -qPCR-F    | 5'-ATGCACGGAGTAGCCATTAC-3'   | qRT-PCR for mouse |
| <i>mPkr</i> -qPCR-R    | 5'-TCCTGCTTTGATCTACCTTTGG-3' | PKR               |
| <i>mGadd34</i> -qPCR-F | 5'-GATCGCTTTTGGCAACCAG-3'    | qRT-PCR for mouse |
| <i>mGadd34</i> -qPCR-R | 5'-CAGGAGATAGAAGTTGTGGGC-3'  | GADD34            |
| <i>mGdf15</i> -qPCR-F  | 5'-GAGAGGACTCGAACTCAGAAC-3'  | qRT-PCR for mouse |
| <i>mGdf15</i> -qPCR-R  | 5'-GACCCCAATCTCACCTCTG-3'    | GDF15             |
| <i>mVegfa</i> -qPCR-F  | 5'-GGCAGCTTGAGTTAAACGAAC-3'  | qRT-PCR for mouse |
| <i>mVegfa</i> -qPCR-R  | 5'-TGGTGACATGGTTAATCGGTC-3'  | VEGFA             |

|                        |                                 |                     |
|------------------------|---------------------------------|---------------------|
| <i>mGcn2</i> -qPCR-F   | 5'-ATTCGTACAGCCAAGATCCAG-3'     | qRT-PCR for mouse   |
| <i>mGcn2</i> -qPCR-R   | 5'-GTGATCCATGAACAAAGCCG-3'      | GCN2                |
| <i>mPerk</i> -qPCR-F   | 5'-TTTGAGCCAATTCAGTGCATG-3'     | qRT-PCR for mouse   |
| <i>mPerk</i> -qPCR-R   | 5'-CTTCCCGCATTACCTTCTCC-3'      | PERK                |
| <i>mHri</i> -qPCR-F    | 5'-TGTCTTTGCTGAACTCACCC-3'      | qRT-PCR for mouse   |
| <i>mHri</i> -qPCR-R    | 5'-TTCTTGAGCTCAATGGACG-3'       | HRI                 |
| <i>mGapdh</i> -qPCR-F  | 5'-GCTGGCACTGCACAAGAAGATGCG-3'  | qRT-PCR for mouse   |
| <i>mGapdh</i> -qPCR-R  | 5'-GGGTCTGGGATGGAAATTGTGAGGG-3' | GAPDH               |
| <i>mPkr</i> -qPCR-F    | 5'-ATGTCCAGATTAGGCGTAGGT-3'     | ChIP for mouse PKR  |
| <i>mPkr</i> -qPCR-R    | 5'-AAATGTCCCAGGAGAAAGGA-3'      |                     |
| <i>mAtf3</i> -qPCR-F   | 5'-CTGAAGGCCGAGAGGTCTCCG-3'     | ChIP for mouse ATF3 |
| <i>mAtf3</i> -qPCR-R   | 5'-GTCAGCCAGAGCACAGCAAGT-3'     |                     |
| <i>mGadd34</i> -qPCR-F | 5'-GCGTGGACGATGTTGGCGCAG-3'     | ChIP for mouse      |
| <i>mGadd34</i> -qPCR-R | TAGCAAAGGCTGTCCCGGCCG-3'        | GADD34              |
| <i>mGdf15</i> -qPCR-F  | 5'-ACGGAAGAACCTGCGGGAA-3'       | ChIP for mouse      |
| <i>mGdf15</i> -qPCR-R  | 5'-CCTCCCATCCAAGCGACTGT-3'      | GDF15               |
| <i>mVegfa</i> -qPCR-F  | 5'-CTAGCTTGTTGGGCCACCTGCA-3'    | ChIP for mouse      |
| <i>mVegfa</i> -qPCR-R  | 5'-GCTGGGGATACCTCCAGAGGTC-3'    | VEGFA               |

#### Supplemental Table 4. Instruments and software

| Instrument/<br>software | Experiment                            | Company              | Model no./<br>version no.     |
|-------------------------|---------------------------------------|----------------------|-------------------------------|
| LI-COR                  | Immunoblot                            | Odyssey              | Odyssey Dlx<br>Imaging System |
| Dismembrator/Sonicator  | Sonication                            | Fisher Scientific    | 550 sonic<br>dismembrator     |
| Tissue lyser            | Tissue lysis                          | Qiagen               | TissueLyser II                |
| RT-PCR machine          | qRT-PCR                               | BioRad               | CFX connect                   |
| NanoDrop spectrometer   | Protein, DNA, and RNA<br>quantitation | Thermo<br>Scientific | NanoDrop 2000c                |
| Confocal Microscope     | Immunofluorescence imaging            | Leica                | Leica SPE                     |

|                                    |                            |                       |               |
|------------------------------------|----------------------------|-----------------------|---------------|
| Inverted Phase Contrast Microscope | Immunofluorescence imaging | Nikon                 | Eclipse TS2   |
| Digital Color Microscope Camera    | Attached to Eclipse TS2    | Nikon                 | DS-Fi3        |
| Stereoscope                        | Microfil casting imaging   | Nikon                 | SMZ800N       |
| Rat Ventilator                     | RV catheterization         | Harvard Apparatus     | VentElite     |
| 1.4F Pressure-volume catheter      | Hemodynamics measurement   | Millar AD Instruments | SPR-839       |
| Hemodynamics analysis software     | Hemodynamics data analysis | AD Instruments        | LabChart 8    |
| MS Excel                           | Statistical analysis       | Microsoft             | MS office 365 |
| GraphPad Prism                     | Statistical analysis       | GraphPad              | Prism 10      |
| Cell sorter                        | Cell sorting               | Miltenyi Biotec       | autoMACS NEO  |
| timsTOF Pro2 and nanoElute UHPLC   | Mass Spectrometry          | Bruker Daltonics      | Pro2          |
